# Supplementary material for: Effects of point defects on the magnetoelectronic structures of MXenes from first principles
Source: Royal Society of Chemistry journal article supplement (doi:10.1039/c7cp07165e), 2018-01-01
Supplement: c7cp07165e1.pdf [file c7cp07165e1.pdf]

## Supporting Information

### Effects of point defects on the magnetoelectronic structures of MXenes from first principles

#### Structure and Energetics:

In all the  $Ti_2XT_2$  systems, the X atoms are in perfect octahedral environment in an Oh symmetry, whereas, in case of  $Ti_2NO_2$ , N atom is in a  $D_{4h}$  symmetry, with two elongated Ti-N bonds. These Ti-N bonds again after defect formation becomes same in length locally.

We compared the energetics of the asymmetric and symmetric  $Ti_2NO_2$  structures (where all the Ti-N and Ti-O bond lengths are same) and find that, asymmetric structure is 0.77 eV more stable. Plotting the charge density difference of the asymmetric and symmetric structure in Figure 2, we find that there is a gain of charge density on Ti-O bond in asymmetric  $Ti_2NO_2$  structure, which gives rise to stronger Ti-O bond formation, leading to stable asymmetric structure. Also, in the symmetric structure the Ti-N bond lengths are 2.17 Å and Ti-O bond lengths are 1.99 Å, again suggesting two shorter and stronger Ti- or Ti-O bond formation in asymmetric  $Ti_2NO_2$ .

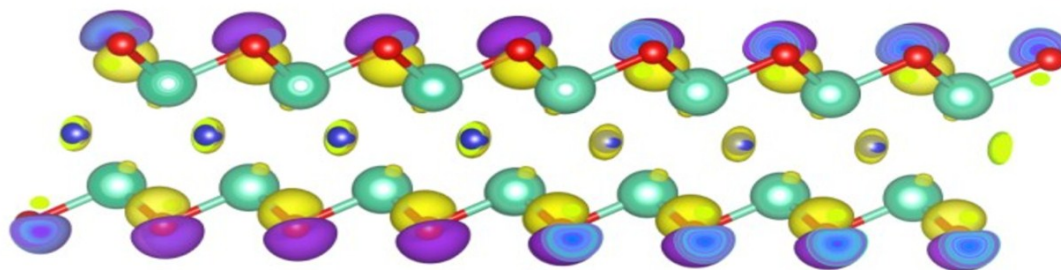

Figure S1: Charge density difference plot in  $Ti_2NO_2$ , yellow region denotes charge accumulation region and purple region denotes charge depletion region in asymmetric  $Ti_2NO_2$  structure.

Table S1: Bond lengths and unit cell lengths of  $Ti_2XT_2$  systems before and after single vacancy (SV) formation

| System | Ti-X bond length (Å) |         | Ti-T bond length (Å) |         | Unit cell length (Å)<br>a/b |
|--------|----------------------|---------|----------------------|---------|-----------------------------|
|        | Pure                 | Near SV | Pure                 | Near SV |                             |
|        |                      |         |                      |         |                             |

|               |              | $V_{Ti}$     | $V_X$ | $V_T$        |              | $V_{Ti}$ | $V_X$        | $V_T$        |      |
|---------------|--------------|--------------|-------|--------------|--------------|----------|--------------|--------------|------|
| $Ti_2CO_2$    | 2.19         | 2.16         | 2.18  | 2.19         | 1.98         | 1.85     | 1.95         | 1.95         | 3.04 |
| $Ti_2CF_2$    | 2.10         | 2.07         | 2.10  | 2.11         | 2.16         | 2.02     | 2.14         | 2.14         | 3.06 |
| $Ti_2C(OH)_2$ | 2.12         | 2.08         | 2.11  | 2.12         | 2.18         | 2.14     | 2.17         | 2.17         | 3.08 |
| $Ti_2NO_2$    | 2.09<br>2.17 | 2.06<br>2.05 | 2.10  | 2.07<br>2.11 | 2.05<br>1.94 | 1.84     | 1.96<br>1.90 | 2.02<br>1.96 | 3.00 |
| $Ti_2NF_2$    | 2.07         | 2.02         | 2.10  | 2.07         | 2.16         | 2.03     | 2.13         | 2.15         | 3.05 |
| $Ti_2N(OH)_2$ | 2.08         | 2.08         | 2.11  | 2.08         | 2.17         | 2.12     | 2.14         | 2.16         | 3.05 |

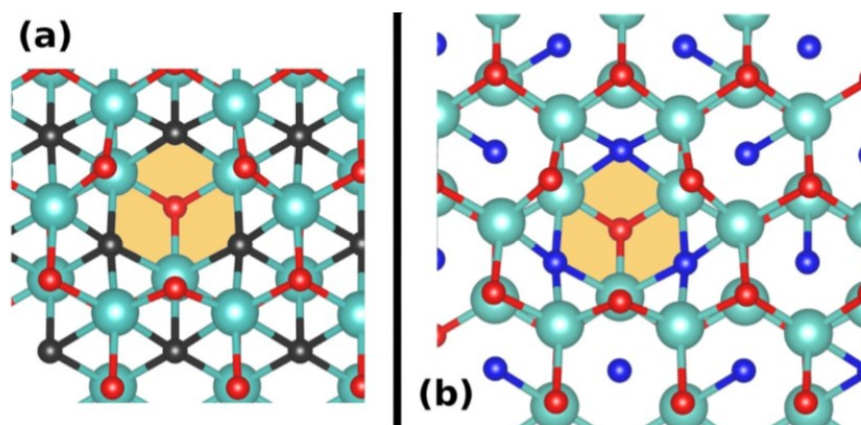

Figure S2: Structural reorganization in (a)  $V_C$ - $Ti_2CO_2$  and (b)  $V_N$ - $Ti_2NO_2$ . This suggests  $Ti_2NO_2$  exhibits more prominent changes because of X defect formation than  $Ti_2CO_2$ .

### Magnetic Properties:

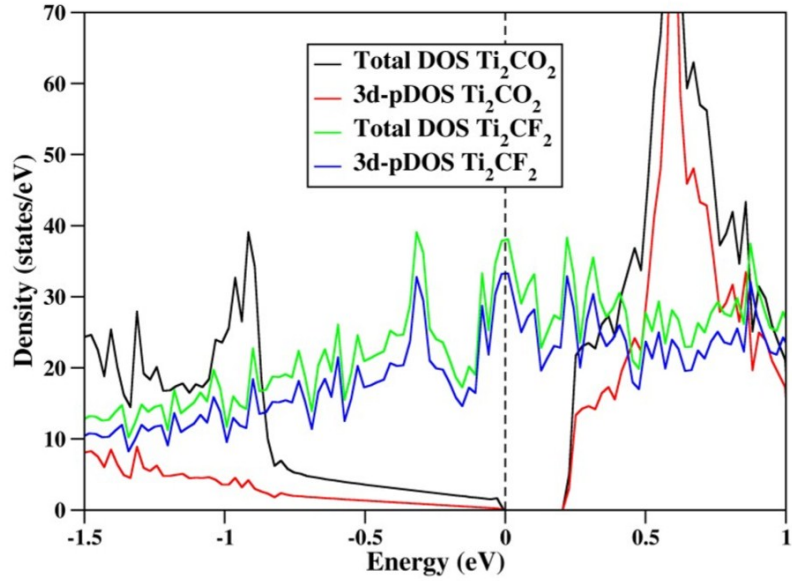

Figure S3: Projected density of states (pDOS) plots of  $\text{Ti}_2\text{CO}_2$  and  $\text{Ti}_2\text{CF}_2$ , showing the contribution of 3d orbitals of Ti. It confirms  $\text{Ti}_2\text{CF}_2$  has filled 3d orbitals but  $\text{Ti}_2\text{CO}_2$  has vacant 3d orbital.

### Electronic Properties:

Except  $\text{Ti}_2\text{XO}_2$  systems, all the other systems are metallic in nature both in their pristine and defective form. Here we are giving band structure plots for two systems as example.

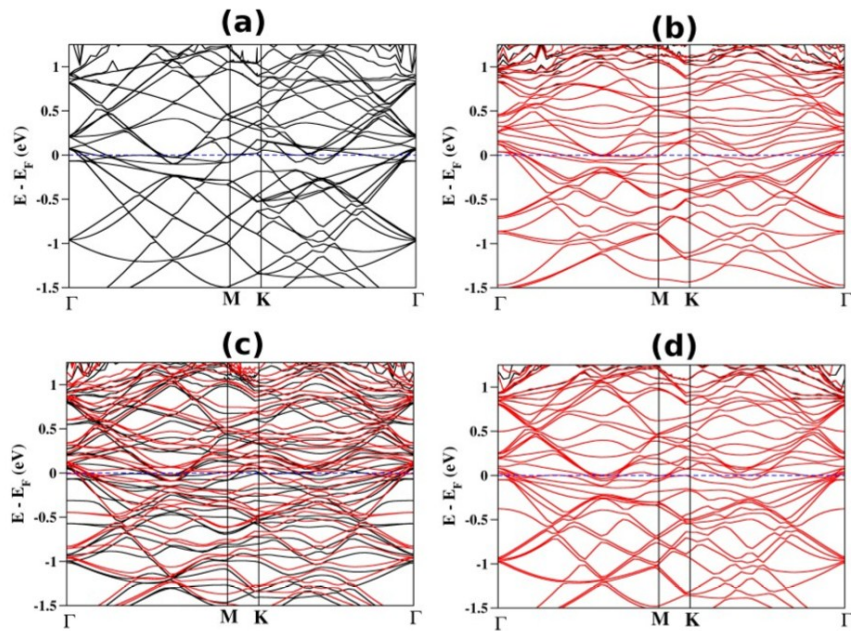

Figure S4: Band structure plot of (a) pure  $\text{Ti}_2\text{CF}_2$ , (b)  $\text{V}_{\text{Ti}}\text{-Ti}_2\text{CF}_2$ , (c)  $\text{V}_{\text{C}}\text{-Ti}_2\text{CF}_2$  and (d)  $\text{V}_{\text{F}}\text{-Ti}_2\text{CF}_2$

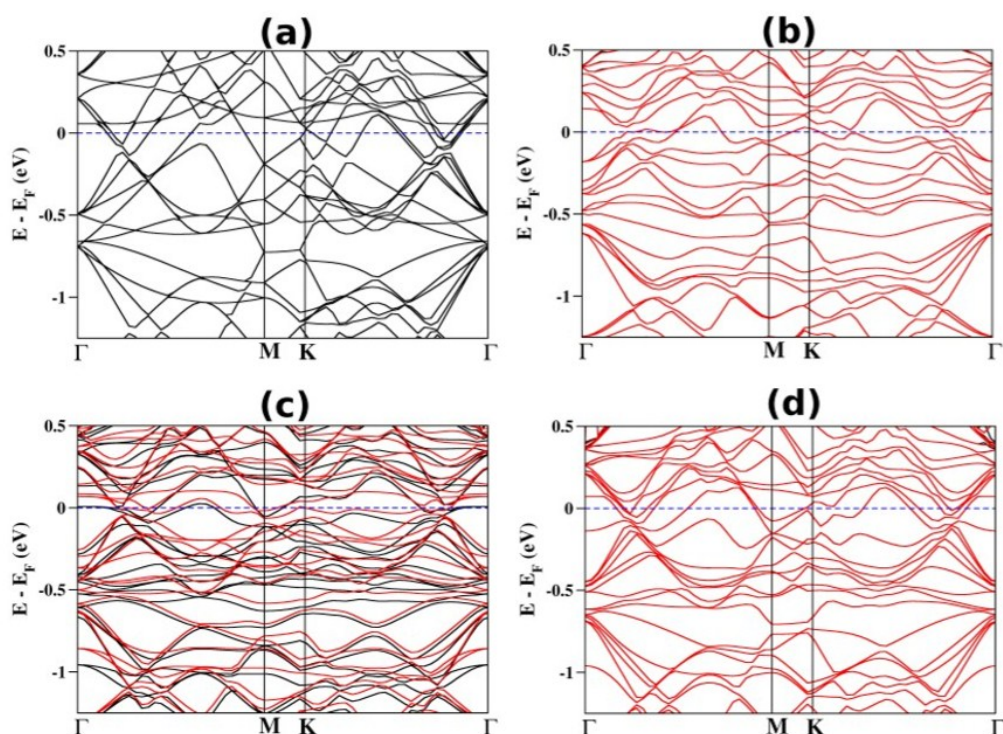

Figure S5: Band structure plot of (a) pure  $\text{Ti}_2\text{NF}_2$ , (b)  $\text{V}_{\text{Ti}}\text{-Ti}_2\text{NF}_2$ , (c)  $\text{V}_{\text{N}}\text{-Ti}_2\text{NF}_2$  and (d)  $\text{V}_{\text{F}}\text{-Ti}_2\text{NF}_2$

### SV in Other MXenes:

To generalize our findings for defect formation in  $\text{Ti}_2\text{XT}_2$ , we have studied the defect formation mechanism in other transition metal atom containing MXenes, such as,  $\text{V}_2\text{CO}_2$ ,  $\text{Mn}_2\text{CO}_2$ ,  $\text{Ta}_2\text{CO}_2$  and  $\text{Re}_2\text{CO}_2$ , also. Note that, all of these pure systems have been studied previously.[1-3] The formation energy of the SVs in  $\text{V}_2\text{CO}_2$ ,  $\text{Mn}_2\text{CO}_2$ ,  $\text{Ta}_2\text{CO}_2$  and  $\text{Re}_2\text{CO}_2$  follows the same trend as that of  $\text{Ti}_2\text{CO}_2$  (see Table S2), that is M defect formation is more difficult than C defect formation. In these cases, M-O bond is stronger than M-C bonds, thus, breaking three M-C bonds and three M-O bonds requires more energy than breaking six M-C bonds, which leads to smaller C defect and higher M defect formation energies. For example, we have calculated the formation energy of the V-C and V-O bonds, and found that V-O bond energy is 3.4 eV and V-C bond energy is 1.71 eV. Similarly, Mn-O bond energy is 1.35 eV and Mn-C bond energy is 0.49 eV. This also tells that in  $\text{Mn}_2\text{CO}_2$ , Mn and C SV formation energy difference is smaller than that of  $\text{V}_2\text{CO}_2$ . Thus, in these MXenes also, where other metal atoms are present, C defect formation is much easier than metal defect formation

because of the presence of a stronger M-O bond in the system validating our result for  $Ti_2XT_2$  systems.

Table S2: SV formation energy in other MXenes:

| System     | Defect formation energy (eV) |          |          |
|------------|------------------------------|----------|----------|
|            | M defect                     | C defect | O defect |
| $V_2CO_2$  | 3.44                         | 0.74     | 3.08     |
| $Mn_2CO_2$ | 3.15                         | 1.06     | 1.09     |
| $Ta_2CO_2$ | 6.42                         | 3.06     | 5.08     |
| $Re_2CO_2$ | 2.06                         | 0.99     | 1.01     |

### Schottky type defect:

Table S3: Schottky type defect formation energy for MXenes:

| System     | Defect formation energy (eV) |                      |                                |                                   |
|------------|------------------------------|----------------------|--------------------------------|-----------------------------------|
|            | TiX defect (near)            | TiX defect (distant) | TiO <sub>2</sub> defect (near) | TiO <sub>2</sub> defect (distant) |
| $Ti_2CO_2$ | 3.86                         | 4.98                 | 3.16                           | 5.99                              |
| $Ti_2NO_2$ | 1.73                         | 2.06                 | 2.02                           | 3.42                              |

TiC/N defects in  $Ti_2CF_2$ ,  $Ti_2C(OH)_2$ ,  $Ti_2NF_2$  and  $Ti_2N(OH)_2$  shows same trend, e.g., in  $Ti_2CF_2$ ,  $TiC_{near}$  energy is 3.58 eV and  $TiC_{distant}$  energy is 4.41 eV.

### Born Oppenheimer Molecular Dynamics calculations:

To consider the reconstruction process in room temperature, we perform constant-temperature BOMD simulations considering the canonical ensemble (NVT) as implemented in the Vienna Ab initio Simulation Package (VASP). We have used the same parameters used for DFT calculations for BOMD calculations also, We use a Nose-Hoover thermostat to adjust the temperature at 300 K during the simulations, and we consider a time step of 1 fs to integrate the equation of motion.[\[4-6\]](#) We have run the simulation upto 40 ps.

Performing the BOMD simulation at 300 K and analysing the resulting trajectory, we find that the equilibrated structures do not show any kind reconstruction or healing process (see Figure S6). Interestingly,  $\text{Ti}_2\text{NO}_2$ , in room temperature also remain asymmetric in nature. The magnetic system  $\text{V}_\text{C}\text{-Ti}_2\text{CF}_2$  retain its magnetic nature even in room temperature.

Moreover, we also have performed AIMD simulation with higher temperature,  $T=500\text{K}$  to access the probable higher energy barrier of structural transition for  $\text{V}_\text{C}\text{-Ti}_2\text{CO}_2$  system. However, as shown in Fig S6, we find no signature of reconstruction of defects during 20 ps long simulation. With this, we can comment about the stability of defects at finite temperature with some certainty.

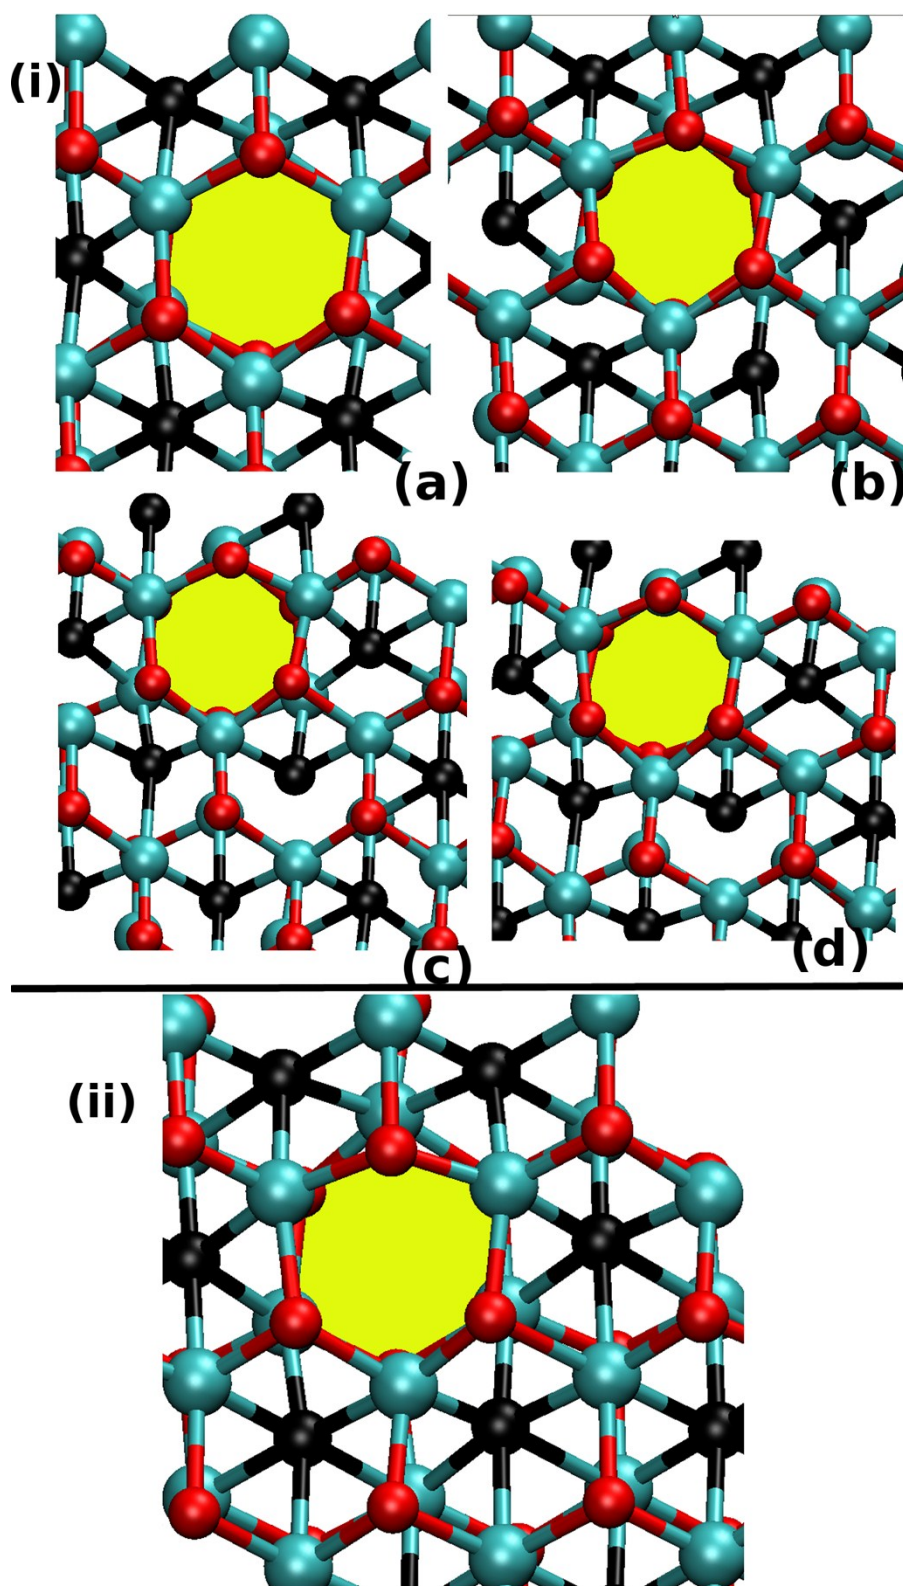

Figure S6 (i) 300 K simulation snapshots at (a) 25, (b) 30, (c) 35 and (d) 40 ps for  $C_V$ - $Ti_2CO_2$  and (ii) 300 K simulation snapshots at 20 ps for  $C_V$ - $Ti_2CO_2$

We find that in presence of multiple defects (in our study Schottky or Frenkel type defects) also the electronic properties of a MXene layer change, as can be seen in Figure S7.

With Schottky and Frenkel type defects, the band-gap variation ensures metal-semiconductor transition in  $\text{Ti}_2\text{CO}_2$ . Schottky defect formation widens up the smaller band-gap of  $\text{Ti}_2\text{CO}_2$  to 0.48 eV ( $\text{TiO}_2$  defect) and 0.33 eV ( $\text{TiC}$  defect), whereas, the Frenkel type defect leads to semiconductor to metal transition in  $\text{Ti}_2\text{CO}_2$ .

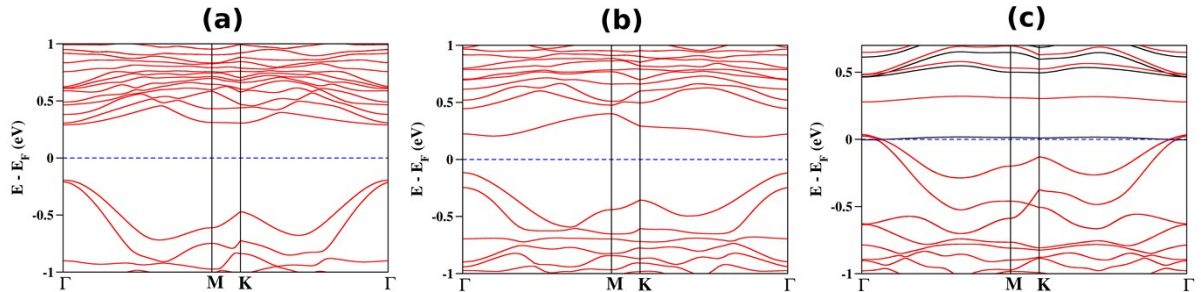

Figure S7: Band structure plot for  $\text{TiO}_2$  defect,  $\text{TiC}$  defect and a Frenkel type defect in  $\text{Ti}_2\text{CO}_2$ .

### Oxidation State:

In our calculations, we have compared the well-known  $\text{TiC}$  or  $\text{TiO}_2$ , which is in +4 formal oxidation state, with our  $\text{Ti}_2\text{CO}_2$  system in the same level of theory and found similar Bader charge on Ti atom for all of them. As our system is not completely ionic, Ti shows a presence of fractional amount of electron in its d-orbital, but this amount is negligible compared to  $\text{Ti}_2\text{CF}_2$  or  $\text{Ti}_2\text{C}(\text{OH})_2$  (as can be seen in Figure S8), thus our results remain unaltered.

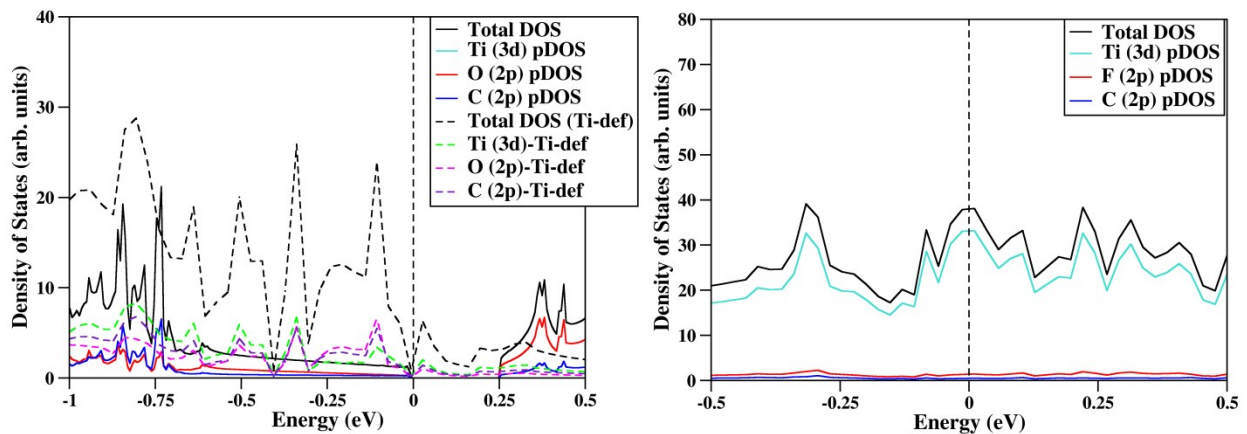

Figure S8: Projected density of states (pDOS) plot for  $\text{Ti}_2\text{CO}_2/\text{V}_{\text{Ti}}\text{-Ti}_2\text{CO}_2$  and  $\text{Ti}_2\text{CF}_2$ , showing a presence of only fractional and negligible amount of d-electrons on Ti in  $\text{Ti}_2\text{CO}_2/\text{V}_{\text{Ti}}\text{-Ti}_2\text{CO}_2$ .



## References:

- [1] M. Naguib, J. Halim, J. Lu, K. M. Cook, L. Hultman, Y. Gogotsi, and M. W. Barsoum, *Journal of the American Chemical Society* **135**, 15966 (2013).
- [2] A. N. Enyashin and A. L. Ivanovskii, *The Journal of Physical Chemistry C* **117**, 13637 (2013).
- [3] J. He, P. Lyu, and P. Nachtigall, *Journal of Materials Chemistry C* **4**, 11143 (2016).
- [4] S. Nosé, *The Journal of chemical physics* **81**, 511 (1984).
- [5] W. G. Hoover, *Physical Review A* **31**, 1695 (1985).
- [6] S. Nosé, *The Journal of chemical physics* **81**, 511 (1984).
